# Supplementary material
Source: MDPI journal article supplement (https://www.mdpi.com/2075-163X/11/12/1346)

# New Facile One-Pot Synthesis of Isobutyl Thiocarbamate in Recycling Solvent Mixture

Goran Milentijević <sup>1</sup>, Aleksandar D. Marinković <sup>2</sup>, Milica Rančić <sup>3</sup>, Aleksandra Bogdanović <sup>2</sup>, Smiljana Marković <sup>1</sup> and Milutin Milosavljević <sup>1,\*</sup>

<sup>1</sup> Faculty of Technical Science, University of Priština, Knjaza Miloša 7, 38220 Kosovska Mitrovica, Serbia; milutin.milosavljevic@pr.ac.rs

<sup>2</sup> Faculty of Technology and Metallurgy, University of Belgrade, Karnegijeva 4, P.O. Box 3503, 11120 Belgrade, Serbia; marinko@tmf.bg.ac.rs

<sup>3</sup> Faculty of Forestry, University of Belgrade, Kneza Višeslava 1, 11030 Beograd, Serbia; milica.rancic@sfb.bg.ac.rs

\* Correspondence: milutin.milosavljevic@pr.ac.rs

## 1. Experimental part

### 1.1. Materials

All reagents and chemicals for the synthesis were purchased from commercial sources (Sigma, St. Louis, MO, USA). All solvents were of reagent purity and used without further purification. Isobutanol - iBuOH (98.0%), potassium hydroxide - KOH (85%), carbon disulfide - CS<sub>2</sub> (98.0%), xylene (99%), calcium hydroxide ( $\geq 95.0\%$ ) were purchased from Merck. Ammonium hydroxide (30-32%) and deuterated chloroform (99.8% of deuterium), were supplied from Sigma Aldrich. All amines: 70% ethyl amine - EtNH<sub>2</sub> (70.0%), propyl amine - PrNH<sub>2</sub> (99.0%), butyl amine - BuNH<sub>2</sub> (99.0%), isopropyl amine - iPrNH<sub>2</sub> (99.5%), isobutyl amine - iBuNH<sub>2</sub> (98.0%), isopentyl amine - iPeNH<sub>2</sub> (98.0%), sec-butyl amine - sBuNH<sub>2</sub> (98.5%), cyclopropyl amine - cycPrNH<sub>2</sub> (98.0%), cyclopentyl amine - cycPeNH<sub>2</sub> (98.0%), cyclohexyl amine - cycHeNH<sub>2</sub> (98.5%), diethyl amine - diEtNH<sub>2</sub> (99.5%), dipropyl amine - diPrNH<sub>2</sub> (96.6%), dibutyl amine - diBuNH<sub>2</sub> (97.5%) are provided from Fluka. Hydrochloric acid (37%), dichloromethane, and sodium sulfate were purchased from Merck.

### 1.2. Experimental results

**Table S1.** <sup>1</sup>H and <sup>13</sup>C NMR data, and results of elemental analysis of synthesized *N*-alkyl, *N,N*-dialkyl and *N*-cycloalkyl-*O*-isobutyl thiocarbamates.

| Compound                 | <sup>1</sup> H NMR (δ/ppm)                                                                                                                                                                                                                                                                                                             | <sup>13</sup> C NMR (δ/ppm)                                                                                                                                                                                                                                     | Elementar analysis<br>Counted/ found            |
|--------------------------|----------------------------------------------------------------------------------------------------------------------------------------------------------------------------------------------------------------------------------------------------------------------------------------------------------------------------------------|-----------------------------------------------------------------------------------------------------------------------------------------------------------------------------------------------------------------------------------------------------------------|-------------------------------------------------|
| iBuOC(S)NH <sub>Et</sub> | 6.30 (1H, d, <i>J</i> =6.5, N-H),<br>4.12-4.28 (2H, q, OCH <sub>2</sub> ),<br>3.21-3.59 (2H, dq, NCH <sub>2</sub> ),<br>1.54-1.73 (1H, sex, CH(CH <sub>3</sub> ) <sub>2</sub> ),<br>0.82-1.07 (9H, m, CH(CH <sub>3</sub> ) <sub>2</sub> , CH <sub>2</sub> CH <sub>3</sub> ).                                                           | 188.8 (C=S),<br>78.69 (OCH <sub>2</sub> ),<br>43.70 (NCH <sub>2</sub> ),<br>28.35 (CH(CH <sub>3</sub> ) <sub>2</sub> ),<br>19.24 (CH(CH <sub>3</sub> ) <sub>2</sub> ),<br>12.1 (CH <sub>2</sub> CH <sub>3</sub> ).                                              | %C 52.13; %H 9.38; %N 8.69; %O 9.92; %S 19.88.  |
|                          |                                                                                                                                                                                                                                                                                                                                        |                                                                                                                                                                                                                                                                 | %C 52.18; %H 9.42; %N 8.66; %O 9.84; %S 19.90.  |
| iBuOC(S)NHPr             | 6.40 (1H, d, <i>J</i> =6.6, N-H),<br>4.13-4.27 (2H, q, OCH <sub>2</sub> ),<br>3.20-3.57 (2H, dq, NCH <sub>2</sub> ),<br>1.94-2.15 (1H, sex, CH(CH <sub>3</sub> ) <sub>2</sub> ),<br>1.52-1.70 (2H, sex, CH <sub>2</sub> CH <sub>3</sub> ),<br>0.90-1.05 (9H, m, CH(CH <sub>3</sub> ) <sub>2</sub> , CH <sub>2</sub> CH <sub>3</sub> ). | 189.8 (C=S),<br>77.69 (OCH <sub>2</sub> ),<br>44.70 (NCH <sub>2</sub> ),<br>27.70 (CH(CH <sub>3</sub> ) <sub>2</sub> ),<br>22.25 (CH <sub>2</sub> CH <sub>3</sub> ),<br>18.96 (CH(CH <sub>3</sub> ) <sub>2</sub> ),<br>12.0 (CH <sub>2</sub> CH <sub>3</sub> ). | %C 60.78; %H 10.66; %N 6.44; %O 7.36; %S 14.75. |
|                          |                                                                                                                                                                                                                                                                                                                                        |                                                                                                                                                                                                                                                                 | %C 60.81; %H 10.70; %N 6.39; %O 7.34; %S 14.76. |

|                |                                                                                                                                                                                                                                                                                                                                                                                                                                                                                        |                                                                                                                                                                                                                                                                                                                                                                                                                                             |                                                                                                        |
|----------------|----------------------------------------------------------------------------------------------------------------------------------------------------------------------------------------------------------------------------------------------------------------------------------------------------------------------------------------------------------------------------------------------------------------------------------------------------------------------------------------|---------------------------------------------------------------------------------------------------------------------------------------------------------------------------------------------------------------------------------------------------------------------------------------------------------------------------------------------------------------------------------------------------------------------------------------------|--------------------------------------------------------------------------------------------------------|
| iBuOC(S)NHBu   | 6.42 (1H, d, $J=6.6$ , N-H),<br>4.15-4.29 (2H, q, OCH <sub>2</sub> ),<br>3.22-3.58 (2H, dq, NCH <sub>2</sub> ),<br>1.92-2.13 (1H, sex, CH(CH <sub>3</sub> ) <sub>2</sub> ),<br>1.52-1.70 (2H, sex, CH <sub>2</sub> CH <sub>2</sub> CH <sub>3</sub> ),<br>0.89-1.05 (9H, m, CH(CH <sub>3</sub> ) <sub>2</sub> ,CH <sub>2</sub> CH <sub>3</sub> ).                                                                                                                                       | 189.7 (C=S),<br>77.85 (OCH <sub>2</sub> ),<br>42.70 (NCH <sub>2</sub> ),<br>32.17 (NCH <sub>2</sub> CH <sub>2</sub> ),<br>28.22 (CH(CH <sub>3</sub> ) <sub>2</sub> ),<br>21.25 (CH <sub>2</sub> CH <sub>3</sub> ),<br>19.21 (CH(CH <sub>3</sub> ) <sub>2</sub> ),<br>13.20 (CH <sub>2</sub> CH <sub>3</sub> ).                                                                                                                              | %C 57.10; %H 10.12; %N 7.40; %O 8.45; %S 16.94.<br><br>%C 57.15; %H 10.15; %N 7.39; %O 8.35; %S 16.96. |
| iBuOC(S)NHsBu  | 6.20 (1H, d, $J=6.5$ , N-H),<br>4.12-4.26 (2H, dd, $J=6.4$ , OCH <sub>2</sub> ),<br>3.76-3.90 (1H, qv, NCH),<br>1.92-2.19 (2H, m, CH <sub>2</sub> CH <sub>3</sub> ),<br>1.42-1.69 (4H, m, NCHCH <sub>3</sub> i CH(CH <sub>3</sub> ) <sub>2</sub> ),<br>0.87-1.21 (9H, m, CH(CH <sub>3</sub> ) <sub>2</sub> i CH <sub>2</sub> CH <sub>3</sub> ).                                                                                                                                        | 189.16 (C=S),<br>77.64 (OCH <sub>2</sub> ),<br>50.75 (NCH),<br>29.22 (CH <sub>2</sub> CH <sub>3</sub> ),<br>28.84 (CH(CH <sub>3</sub> ) <sub>2</sub> ),<br>19.87 (NCHCH <sub>3</sub> ),<br>19.23 CH(CH <sub>3</sub> )CH <sub>3</sub> ,<br>18.96 (CH(CH <sub>3</sub> )CH <sub>3</sub> ),<br>10.20 (CH <sub>2</sub> CH <sub>3</sub> ).                                                                                                        | %C 63.62; %H 11.09; %N 5.71; %O 6.52; %S 13.07.<br><br>%C 63.58; %H 11.16; %N 5.76; %O 6.46; %S 13.04. |
| iBuOC(S)NHiPr  | 6.22 (1H, d, $J=6.8$ , N-H),<br>4.33-4.47 (1H, m, OCH <sub>2</sub> ),<br>4.15-4.28 (1H dd, $J=6.7$ , NCH),<br>1.90-2.15 (1H, m, CH <sub>2</sub> CH(CH <sub>3</sub> ) <sub>2</sub> ),<br>1.12-1.26 (6H, q, NCH(CH <sub>3</sub> ) <sub>2</sub> ),<br>0.94-1.01 (6H, t, CH <sub>2</sub> CH(CH <sub>3</sub> ) <sub>2</sub> ).                                                                                                                                                              | 189.12 (C=S),<br>77.66 (OCH <sub>2</sub> ),<br>45.23 (NCH),<br>27.66 (CH <sub>2</sub> CH(CH <sub>3</sub> ) <sub>2</sub> ),<br>22.18 (NCH(CH <sub>3</sub> )CH <sub>3</sub> ),<br>21.76(NCH(CH <sub>3</sub> )CH <sub>3</sub> ), 18.94 (CH <sub>2</sub> CH(CH <sub>3</sub> ) <sub>2</sub> ).                                                                                                                                                   | %C 54.81; %H 9.78; %N 7.99; %O 9.13; %S 18.29.<br><br>%C 54.69; %H 9.82; %N 8.06; %O 9.15; %S 18.28.   |
| iBuOC(S)NHiBu  | 6.40 (1H, d, $J=6.4$ , N-H),<br>4.19-4.28 (2H, q, OCH <sub>2</sub> ),<br>3.09-3.44 (2H, sex, NCH <sub>2</sub> ),<br>1.90-2.19 (1H, m, NCH <sub>2</sub> CH),<br>1.74-1.89 (1H, qv, OCH <sub>2</sub> CH),<br>0.93-1.01 (12H, m, NCH <sub>2</sub> CH(CH <sub>3</sub> ) <sub>2</sub> i OCH <sub>2</sub> CH(CH <sub>3</sub> ) <sub>2</sub> ).                                                                                                                                               | 189.94(C=S),<br>77.75(OCH <sub>2</sub> ),<br>50.40 (NCH <sub>2</sub> ),<br>28.28 (NCH <sub>2</sub> CH),<br>27.73 (OCH <sub>2</sub> CH),<br>20.05 (NCH <sub>2</sub> CH(CH <sub>3</sub> ) <sub>2</sub> ),<br>19.96 (OCH <sub>2</sub> CH(CH <sub>3</sub> )CH <sub>3</sub> ),<br>18.97 (OCH <sub>2</sub> CH(CH <sub>3</sub> )CH <sub>3</sub> )                                                                                                  | %C 54.81; %H 9.78; %N 7.99; %O 9.13; %S 18.29<br><br>%C 54.75; %H 9.85; %N 8.11; %O 9.18; %S 18.11.    |
| iBuOC(S)NHiPen | 6.33 (1H, d, $J=6.6$ , N-H),<br>4.17-4.27 (2H, q, OCH <sub>2</sub> ),<br>3.16-3.61 (2H, dq, NCH <sub>2</sub> ),<br>1.89-2.15 (1H, m, NCH <sub>2</sub> CH <sub>2</sub> CH),<br>1.63-1.76 (1H, m, OCH <sub>2</sub> CH),<br>1.38-1.56 (2H, m, NCH <sub>2</sub> CH <sub>2</sub> ),<br>1.62 (1H, m, N-CH <sub>2</sub> CH <sub>2</sub> CH)<br>0.87-1.01 (12H, m, OCH <sub>2</sub> CH(CH <sub>3</sub> ) <sub>2</sub> i (NCH <sub>2</sub> CH <sub>2</sub> CH(CH <sub>3</sub> ) <sub>2</sub> ). | 189.63 (C=S),<br>77.67 (OCH <sub>2</sub> ),<br>37.71 (NCH <sub>2</sub> ),<br>37.29 (NCH <sub>2</sub> CH <sub>2</sub> ),<br>27.66 (OCH <sub>2</sub> CH),<br>25.46 (NCH <sub>2</sub> CH <sub>2</sub> CH),<br>22.29 (NCH <sub>2</sub> CH <sub>2</sub> CH(CH <sub>3</sub> )CH <sub>3</sub> ),<br>22.16 (NCH <sub>2</sub> CH <sub>2</sub> CH(CH <sub>3</sub> )CH <sub>3</sub> ),<br>18.94 (OCH <sub>2</sub> CH(CH <sub>3</sub> ) <sub>2</sub> ). | %C 59.07; %H 10.41; %N 6.89; %O 7.87; %S 15.77<br><br>%C 59.11; %H 10.38; %N 6.93; %O 7.82; %S 15.76.  |
| iBuOC(S)NHcPr  | 6.42 (1H, d, $J=6.8$ , N-H),<br>4.20-4.36 (2H, dd, $J=6.7$ , OCH <sub>2</sub> ),<br>1.42-1.54 (2H, m, CH(CH <sub>3</sub> ) <sub>2</sub> i 1-Cpr),<br>0.82-0.97 (10H, m, CH(CH <sub>3</sub> ) <sub>2</sub> i 2-Cpr).                                                                                                                                                                                                                                                                    | 189.8 (C=S),<br>77.88 (OCH <sub>2</sub> ),<br>28.21 (CH(CH <sub>3</sub> ) <sub>2</sub> ),<br>25.21 (1-Cpr)<br>20.56 (CH(CH <sub>3</sub> ) <sub>2</sub> ),<br>7.32 (2-Cpr).                                                                                                                                                                                                                                                                  | %C 55.45; %H 8.73; %N 8.08; %O 9.23; %S 18.51.<br><br>%C 55.34; %H 8.56; %N 8.21; %O 9.14; %S 18.65.   |

|                            |                                                                                                                                                                                                                                                                                                                                                                          |                                                                                                                                                                                                                                                                                                                                                                                                                                                                                                                             |                                                                                                                                              |
|----------------------------|--------------------------------------------------------------------------------------------------------------------------------------------------------------------------------------------------------------------------------------------------------------------------------------------------------------------------------------------------------------------------|-----------------------------------------------------------------------------------------------------------------------------------------------------------------------------------------------------------------------------------------------------------------------------------------------------------------------------------------------------------------------------------------------------------------------------------------------------------------------------------------------------------------------------|----------------------------------------------------------------------------------------------------------------------------------------------|
| iBuOC(S)NHcPen             | 6.32 (1H, d, $J=6.6$ , N-H),<br>4.16-4.27 (2H, dd, $J=6.7$ , OCH <sub>2</sub> ),<br>1.46 (1H, m, CH(CH <sub>3</sub> ) <sub>2</sub> )<br>1.81-2.15 (5H, m, 1- i 2-Cpent),<br>1.43-1.67 (7H, m, 3-Cpent i CH(CH <sub>3</sub> ) <sub>2</sub> ).                                                                                                                             | 189.28(C=S),<br>77.78 (OCH <sub>2</sub> ),<br>56.43 (C1-Cpen),<br>37.78 (C2-Cpen),<br>32.31 (C2-Cpen),<br>27.75 (CH(CH <sub>3</sub> ) <sub>2</sub> ),<br>23.56 (C3-Cpen),<br>23.03 (C3-Cpen),<br>18.99 (CH(CH <sub>3</sub> )CH <sub>3</sub> ),<br>18.74 (CH(CH <sub>3</sub> )CH <sub>3</sub> ).                                                                                                                                                                                                                             | %C 57.10; %H 10.12; %N<br>7.40; %O 8.45; %S 16.94.<br><br><br><br><br><br><br><br><br><br>%C 57.14; %H 10.04; %N<br>7.45; %O 8.42; %S 16.95. |
| iBuOC(S)NHcHex             | 6.23 (1H, d, $J=6.4$ N-H),<br>3.31 (2H, dd, $J=6.9$ , OCH <sub>2</sub> )<br>3.66-3.74 (1H, m, 1-Cheks),<br>1.87-2.12 (2H, m, 2-Cheks),<br>1.50-1.78 (3H, m, 4- i 2-Cheks),<br>1.05-1.44 (6H, m, 3-Cheks, 4-Cheks<br>CH(CH <sub>3</sub> ) <sub>2</sub> ),<br>0.89-1.00 (6H, m, CH(CH <sub>3</sub> ) <sub>2</sub> ).                                                       | 189.41(C=S),<br>77.62(OCH <sub>2</sub> ),<br>52.29 (C1-Chex),<br>32.39 (C2-Chex),<br>32.05 (C2-Cheks),<br>27.64 (CH(CH <sub>3</sub> ) <sub>2</sub> ),<br>25.27 (C4-Chex),<br>24.60 (C3-Chex),<br>24.47(C3-Chex),<br>18.97 (CH(CH <sub>3</sub> ) <sub>2</sub> ).                                                                                                                                                                                                                                                             | %C 59.66; %H 9.51; %N<br>6.96; %O 7.95; %S 15.93.<br><br><br><br><br><br><br><br><br><br>%C 59.64; %H 9.58; %N<br>6.90; %O 7.97; %S 15.91.   |
| iBuOC(S)N(Et) <sub>2</sub> | 4.18-4.20 (2H, d, $J=6.5$ , OCH <sub>2</sub> ),<br>3.24-3.62 NCH <sub>2</sub> (2H, sex, NCH <sub>2</sub> ),<br>1.8-2.09 (1H, sex, CH(CH <sub>3</sub> ) <sub>2</sub> ),<br>0.87-1.16 (12H, qv, N(CH <sub>2</sub> CH <sub>3</sub> ) <sub>2</sub> )<br>iCH(CH <sub>3</sub> ) <sub>2</sub> ).                                                                                | 187.76 (C=S),<br>77.64 (OCH <sub>2</sub> ),<br>42.79 N(CH <sub>2</sub> CH <sub>3</sub> ) <sub>2</sub> ,<br>28.20 (CH(CH <sub>3</sub> ) <sub>2</sub> ),<br>19.18(CH(CH <sub>3</sub> ) <sub>2</sub> ),<br>12.18 (CH <sub>2</sub> CH <sub>3</sub> ).                                                                                                                                                                                                                                                                           | %C 57.10; %H 10.12; %N<br>7.40; %O 8.45; %S 16.94.<br><br><br><br><br><br><br>%C 57.12; %H 10.18; %N<br>7.48; %O 8.50; %S 16.91.             |
| iBuOC(S)N(Pr) <sub>2</sub> | 4.19-4.22 (2H, d, $J=6.5$ , OCH <sub>2</sub> ),<br>3.74 (4H, sex, NCH <sub>2</sub> ),<br>1.97-2.11 (1H, qv, CH),<br>1.52-1.82 (4H, m, 2(CH <sub>2</sub> CH <sub>3</sub> )),<br>0.87-1.00 (12H, qv, N(CH <sub>2</sub> CH <sub>2</sub> CH <sub>3</sub> ) <sub>2</sub> ) i<br>CH(CH <sub>3</sub> ) <sub>2</sub> ).                                                          | 187.76 (C=S),<br>77.64 (OCH <sub>2</sub> ),<br>27.79 (CH(CH <sub>3</sub> ) <sub>2</sub> ),<br>21.20 (N(CH <sub>2</sub> CH <sub>2</sub> CH <sub>3</sub> ) <sub>2</sub> ),<br>20.90 (NCH <sub>2</sub> CH <sub>2</sub> )<br>19.83 (CH(CH <sub>3</sub> )CH <sub>3</sub> ),<br>19.08(CH(CH <sub>3</sub> )CH <sub>3</sub> ),<br>11.18 (CH <sub>2</sub> CH <sub>3</sub> ),<br>11.07 (CH <sub>2</sub> CH <sub>3</sub> ).                                                                                                            | %C 61.35; %H 9.83; %N<br>6.50; %O 7.43; %S 14.89.<br><br><br><br><br><br><br><br><br><br>%C 61.39; %H 9.78; %N<br>6.48; %O 7.50; %S 14.85.   |
| iBuOC(S)N(Bu) <sub>2</sub> | 4.19-4.22 (2H, d, $J=6.8$ , OCH <sub>2</sub> ),<br>3.70-3.77 (4H, t, N(CH <sub>2</sub> ),<br>3.38-3.45 (4H, t, N(CH <sub>2</sub> ) CH <sub>2</sub> ) <sub>2</sub> ),<br>1.23-1.40 (5H, qv, 2(CH <sub>2</sub> CH <sub>3</sub> ) i<br>CH(CH <sub>3</sub> ) <sub>2</sub> ), 0.90-1.00 (12H, m,<br>CH(CH <sub>3</sub> ) <sub>2</sub> i 2(CH <sub>2</sub> CH <sub>3</sub> )). | 187.59(C=S),<br>77.64 (OCH <sub>2</sub> ),<br>48.65 (N(CH <sub>2</sub> ) <sub>2</sub> )<br>29.99 (N(CH <sub>2</sub> ) <sub>2</sub> (CH <sub>2</sub> ) <sub>2</sub> ),<br>28.70 (CH(CH <sub>3</sub> ) <sub>2</sub> ),<br>20.05 ((CH <sub>2</sub> ) <sub>2</sub> (CH <sub>3</sub> ) <sub>2</sub> ),<br>19.97(CH(CH <sub>3</sub> )CH <sub>3</sub> ),<br>19.10 (CH(CH <sub>3</sub> )CH <sub>3</sub> ),<br>13.71 (CH <sub>2</sub> CH <sub>2</sub> CH <sub>3</sub> ),<br>13.66(CH <sub>2</sub> CH <sub>2</sub> CH <sub>3</sub> ). | %C 57.10; %H 10.12; %N<br>7.40; %O 8.45; %S 16.94.<br><br><br><br><br><br><br><br><br><br>%C 57.14; %H 10.16; %N<br>7.35; %O 8.43; %S 16.92. |

s singlet; d doublet; dd double doublet, t triplet; q quartet, dq double quartet; qv quintet; sex sex-  
tet;hept heptet, m multiplet; Cpr cyclopropane ring; Cpent cyclopentane ring; Numeration of the  
cyclohexane ring (numbering begins with the nitrogen and oxygen atom).

**Table S2.** FTIR and MS data of *N*-alkyl, *N,N*-dialkyl and *N*-cycloalkyl-*O*-isobutyl thiocarbamate.

| Compound                   | IR, $\nu_{\max}$ $\text{cm}^{-1}$                                                                                                                                                                                                                                                                                                                                                                                                   | MS $m/z$ |
|----------------------------|-------------------------------------------------------------------------------------------------------------------------------------------------------------------------------------------------------------------------------------------------------------------------------------------------------------------------------------------------------------------------------------------------------------------------------------|----------|
| iBuOC(S)NHEt               | 3255 ( $\nu_{\text{NH}}$ ), 3045, 2951 ( $\nu_{\text{asCH}_3}$ ), 2935 ( $\nu_{\text{asCH}_2}$ ), 2897 ( $\nu_{\text{sCH}_3}$ and $\nu_{\text{sCH}_2}$ ), 2799 ( $\nu_{\text{sCH}_3}$ and $\nu_{\text{sCH}_2}$ ), 1701, 1514 ( $\delta_{\text{asCH}_3}$ ), 1434 ( $\delta_{\text{sCH}_3}$ ), 1397, 1329, 1260, 1203, 1119 ( $\nu\text{C}=\text{S}$ ), 1032 ( $\nu\text{C}-\text{N}$ ), 988 ( $\gamma\text{C}-\text{H}$ ), 884, 777. | 170,15   |
| iBuOC(S)NHPr               | 3259 ( $\nu_{\text{NH}}$ ), 3051, 2963 ( $\nu_{\text{asCH}_3}$ ), 2935 ( $\nu_{\text{asCH}_2}$ ), 2875 ( $\nu_{\text{sCH}_3}$ and $\nu_{\text{sCH}_2}$ ), 2727, 1705, 1524 ( $\delta_{\text{asCH}_3}$ ), 1464 ( $\delta_{\text{sCH}_3}$ ), 1406, 1332, 1262, 1199, 1124 ( $\nu\text{C}=\text{S}$ ), 1037 ( $\nu\text{C}-\text{N}$ ), 989 ( $\gamma\text{C}-\text{H}$ ), 891, 780.                                                   | 175,29   |
| iBuOC(S)NHBu               | 3239 ( $\nu_{\text{NH}}$ ), 3045, 2945 ( $\nu_{\text{asCH}_3}$ and $\nu_{\text{sCH}_3}$ ), 2854 ( $\nu_{\text{sCH}_3}$ and $\nu_{\text{sCH}_2}$ ), 2721, 1699, 1512 ( $\delta_{\text{asCH}_3}$ ), 1450 ( $\delta_{\text{sCH}_3}$ ), 1396, 1321, 1270, 1206, 1119 ( $\nu\text{C}=\text{S}$ ), 1037 ( $\nu\text{C}-\text{N}$ ), 983 ( $\gamma\text{C}-\text{H}$ ), 776, 725.                                                          | 185,45   |
| iBuOC(S)NHsBu              | 3246 ( $\nu_{\text{NH}}$ ), 2966 ( $\nu_{\text{asCH}_3}$ ), 2934 ( $\nu_{\text{asCH}_2}$ ), 2876 ( $\nu_{\text{sCH}_3}$ and $\nu_{\text{sCH}_2}$ ), 2727, 1701, 1519 ( $\delta_{\text{asCH}_3}$ ), 1456 ( $\delta_{\text{sCH}_3}$ ), 1403, 1330, 1272, 1202, 1123 ( $\nu\text{C}=\text{S}$ ), 1049 ( $\nu\text{C}-\text{N}$ ), 1022, 998 ( $\gamma\text{C}-\text{H}$ ), 782, 723.                                                   | 189,32   |
| iBuOC(S)NHIPr              | 3248 ( $\nu_{\text{NH}}$ ), 2969 ( $\nu_{\text{asCH}_3}$ ), 2935 ( $\nu_{\text{asCH}_2}$ ), 2874 ( $\nu_{\text{sCH}_3}$ and $\nu_{\text{sCH}_2}$ ), 1700, 1519 ( $\delta_{\text{asCH}_3}$ ), 1475 ( $\delta_{\text{sCH}_3}$ ), 1403, 1368, 1314, 1205, 1120 ( $\nu\text{C}=\text{S}$ ), 1039 ( $\nu\text{C}-\text{N}$ ), 996 ( $\gamma\text{C}-\text{H}$ ), 728.                                                                    | 175,29   |
| iBuOC(S)NHiBu              | 3252 ( $\nu_{\text{NH}}$ ), 2961 ( $\nu_{\text{asCH}_3}$ ), 2934 ( $\nu_{\text{asCH}_2}$ ), 2873 ( $\nu_{\text{sCH}_3}$ and $\nu_{\text{sCH}_2}$ ), 1522 ( $\delta_{\text{asCH}_3}$ ), 1468 ( $\delta_{\text{sCH}_3}$ ), 1406, 1385, 1332, 1201, 1126 ( $\nu\text{C}=\text{S}$ ), 1030 ( $\nu\text{C}-\text{N}$ ), 1090, 997 ( $\gamma\text{C}-\text{H}$ ).                                                                         | 189,32   |
| iBuOC(S)NHiPent            | 3259 ( $\nu_{\text{NH}}$ ), 2959 ( $\nu_{\text{asCH}_3}$ ), 2935 ( $\nu_{\text{asCH}_2}$ ), 2873 ( $\nu_{\text{sCH}_3}$ and $\nu_{\text{sCH}_2}$ ), 1522 ( $\delta_{\text{asCH}_3}$ ), 1469 ( $\delta_{\text{sCH}_3}$ ), 1405, 1367, 1326, 1243, 1194, 1125 ( $\nu\text{C}=\text{S}$ ), 1046 ( $\nu\text{C}-\text{N}$ ), 989 ( $\gamma\text{C}-\text{H}$ ).                                                                         | 203,34   |
| iBuOC(S)NHICPr             | 3244 ( $\nu_{\text{NH}}$ ), 2967 ( $\nu_{\text{asCH}_3}$ ), 2938 ( $\nu_{\text{asCH}_2}$ ), 2876 ( $\nu_{\text{sCH}_3}$ and $\nu_{\text{sCH}_2}$ ), 1526 ( $\delta_{\text{asCH}_3}$ ), 1474 ( $\delta_{\text{sCH}_3}$ ), 1412, 1392, 1338, 1212, 1134 ( $\nu\text{C}=\text{S}$ ), 1060 ( $\nu\text{C}-\text{N}$ ), 987 ( $\gamma\text{C}-\text{H}$ ).                                                                               | 173,28   |
| iBuOC(S)NHICPen            | 3251 ( $\nu_{\text{NH}}$ ), 2960 ( $\nu_{\text{asCH}_3}$ ), 2872 ( $\nu_{\text{sCH}_3}$ and $\nu_{\text{sCH}_2}$ ), 2111, 1698, 1653, 1519 ( $\delta_{\text{asCH}_3}$ ), 1470 ( $\delta_{\text{sCH}_3}$ ), 1404, 1347, 1293, 1203, 1168, 1088 ( $\nu\text{C}=\text{S}$ ), 1050 ( $\nu\text{C}-\text{N}$ ), 991 ( $\gamma\text{C}-\text{H}$ ), 964, 738, 653.                                                                        | 201,33   |
| iBuOC(S)NHICHex            | 3399, 3244 ( $\nu_{\text{NH}}$ ), 2933 ( $\nu_{\text{asCH}_3}$ and $\nu_{\text{asCH}_2}$ ), 2855 ( $\nu_{\text{sCH}_3}$ and $\nu_{\text{sCH}_2}$ ), 2662, 2103, 1700, 1515 ( $\delta_{\text{asCH}_3}$ ), 1450 ( $\delta_{\text{sCH}_3}$ ), 1403, 1347, 1251, 1172 ( $\nu\text{C}=\text{S}$ ), 1015, 970 ( $\gamma\text{C}-\text{H}$ ), 892, 744.                                                                                    | 215,36   |
| iBuOC(S)N(Et) <sub>2</sub> | 2957 ( $\nu_{\text{asCH}_3}$ ), 2928 ( $\nu_{\text{asCH}_2}$ ), 2736, 1698, 1490 ( $\delta_{\text{asCH}_3}$ ), 1459 ( $\delta_{\text{sCH}_3}$ ), 1413, 1349, 1313, 1276, 1393, 1217, 1160 ( $\nu\text{C}=\text{S}$ ), 1033 ( $\nu\text{C}-\text{N}$ ), 956 ( $\gamma\text{C}-\text{H}$ ), 891, 750.                                                                                                                                 | 216,93   |
| iBuOC(S)N(Pr) <sub>2</sub> | 2964 ( $\nu_{\text{asCH}_3}$ ), 2934 ( $\nu_{\text{asCH}_2}$ ), 2875 ( $\nu_{\text{sCH}_3}$ and $\nu_{\text{sCH}_2}$ ), 2730, 1700, 1499 ( $\delta_{\text{asCH}_3}$ ), 1465 ( $\delta_{\text{sCH}_3}$ ), 1422, 1370, 1318, 1285, 1247, 1226, 1172 ( $\nu\text{C}=\text{S}$ ), 1044 ( $\nu\text{C}-\text{N}$ ), 965 ( $\gamma\text{C}-\text{H}$ ), 938, 894, 751.                                                                    | 217,37   |
| iBuOC(S)N(Bu) <sub>2</sub> | 2960 ( $\nu_{\text{asCH}_3}$ ), 2933 ( $\nu_{\text{asCH}_2}$ ), 2873 ( $\nu_{\text{sCH}_3}$ and $\nu_{\text{sCH}_2}$ ), 2732, 1735, 1690, 1652, 1501 ( $\delta_{\text{asCH}_3}$ ), 1466 ( $\delta_{\text{sCH}_3}$ ), 1423, 1274, 1210, 1170 ( $\nu\text{C}=\text{S}$ ), 1042 ( $\nu\text{C}-\text{N}$ ), 965 ( $\gamma\text{C}-\text{H}$ ), 916.                                                                                    | 245,42   |



**Table S3.**  $^1\text{H}$  and  $^{13}\text{C}$  NMR data, and results of elemental analysis of *O,O*-dialkyl dioxanthates intermediates.

| Compound                | $^1\text{H}$ NMR ( $\delta/\text{ppm}$ )       | $^{13}\text{C}$ NMR ( $\delta/\text{ppm}$ ) | Elemental analysis<br>Counted/ found |
|-------------------------|------------------------------------------------|---------------------------------------------|--------------------------------------|
| (iBuOCS) $_2\text{S}_2$ | 3.31 (4H, dd, $J=6.9$ , $\text{OCH}_2$ )       | 172.8 (C=S),                                | %C 40.54; %H 6.25;                   |
|                         | 1.45 (2H, m, $\text{CH}(\text{CH}_3)_2$ )      | 75.69 ( $\text{OCH}_2$ ),                   | %O 10.52; %S 42.69;                  |
|                         | 0.89–1.00 (6H, m, $\text{CH}(\text{CH}_3)_2$ ) | 27.35 (CH),                                 | %C 40.24; %H 6.08;                   |
|                         |                                                | 19.24 ( $\text{CH}(\text{CH}_3)_2$ )        | %O 10.72; %S 42.97;                  |
| (EtOCS) $_2\text{S}_2$  | 3.64 (2H, q, $\text{OCH}_2$ )                  | 172.0 (C=S),                                | %C 29.55; %H 5.98;                   |
|                         | 1.32 (6H, m, $\text{CH}_3$ )                   | 69.7 ( $\text{OCH}_2$ ),                    | %O 10.82; %S 43.65;                  |
|                         |                                                | 14.0 ( $\text{CH}_3$ )                      | %C 29.73; %H 4.16;                   |
|                         |                                                |                                             | %O 13.20; %S 52.91;                  |

**Table S4.** FTIR and MS data of *O,O*-dialkyl dioxanthates intermediates.

| Compound                | IR, $\nu_{\text{max}}$ $\text{cm}^{-1}$                                                                                                                                                                                                                                                                                                                                                                                             | MS $m/z$ |
|-------------------------|-------------------------------------------------------------------------------------------------------------------------------------------------------------------------------------------------------------------------------------------------------------------------------------------------------------------------------------------------------------------------------------------------------------------------------------|----------|
| (iBuOCS) $_2\text{S}_2$ | 3045, 2951 ( $\nu_{\text{as}}\text{CH}_3$ ), 2897 ( $\nu_{\text{s}}\text{CH}_3$ and $\nu_{\text{s}}\text{CH}_2$ ), 2799 ( $\nu_{\text{s}}\text{CH}_3$ and $\nu_{\text{s}}\text{CH}_2$ ), 1514 ( $\delta_{\text{as}}\text{CH}_3$ ), 1434 ( $\delta_{\text{s}}\text{CH}_3$ ), 1397, 1329, 1260, 1203, 1119, 1015 ( $\nu\text{C}=\text{S}$ ), 988 ( $\gamma\text{C-H}$ ), 884, 777 ( $\nu\text{C-S}$ ), 700 ( $\delta\text{C-S-S-C}$ ) | 298.019  |
| (EtOCS) $_2\text{S}_2$  | 2976 ( $\nu_{\text{as}}\text{CH}_3$ ), 2932 ( $\nu_{\text{s}}\text{CH}_3$ and $\nu_{\text{s}}\text{CH}_2$ ), 2870 ( $\nu_{\text{s}}\text{CH}_3$ and $\nu_{\text{s}}\text{CH}_2$ ), 1450 ( $\delta_{\text{as}}\text{CH}_3$ ), 1448, 1370, 1350 ( $\delta_{\text{s}}\text{CH}_3$ ), 1276, 1145, 1119, 1015 ( $\nu\text{C}=\text{S}$ ), 890 ( $\gamma\text{C-H}$ ), 884, 786 ( $\nu\text{C-S}$ ), 710 ( $\delta\text{C-S-S-C}$ )       | 241.956  |

### FTIR spectra

**Figure S1.** FTIR spectrum of N-ethyl-O-isobutyl thiocarbamate.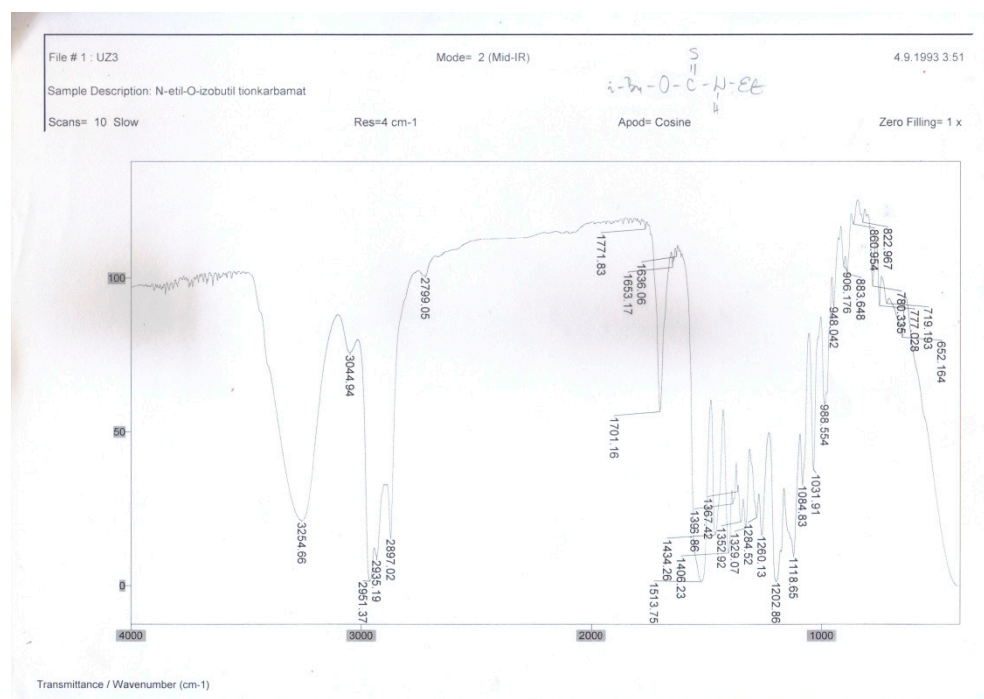

**Figure S2.** FTIR spectrum of N-propyl-O-isobutyl thiocarbamate.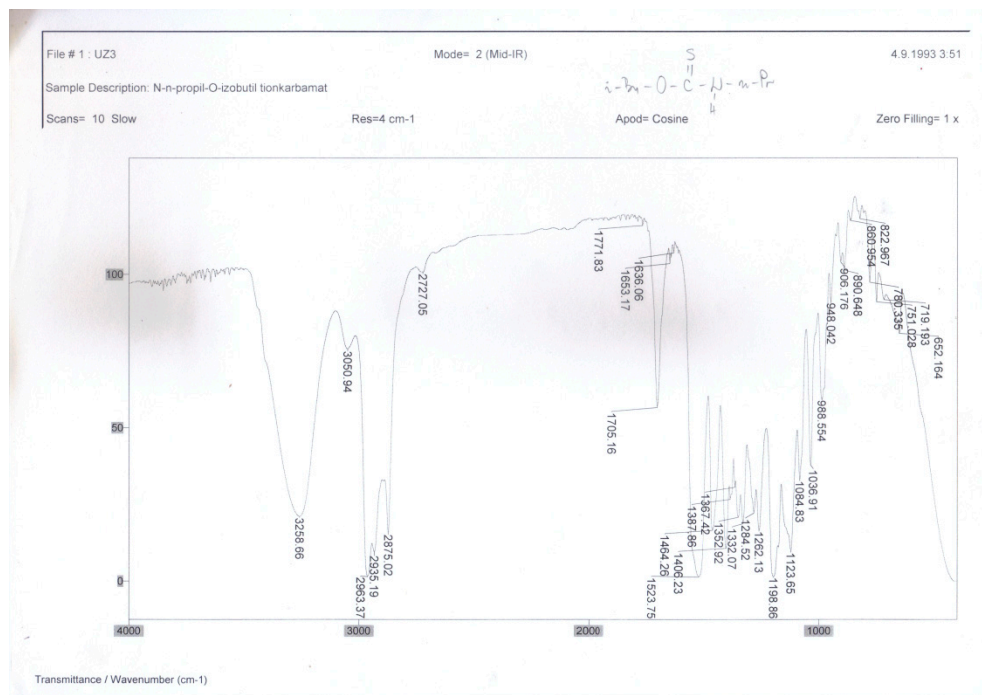**Figure S3.** FTIR spectrum of N-butyl-O-isobutyl thiocarbamate.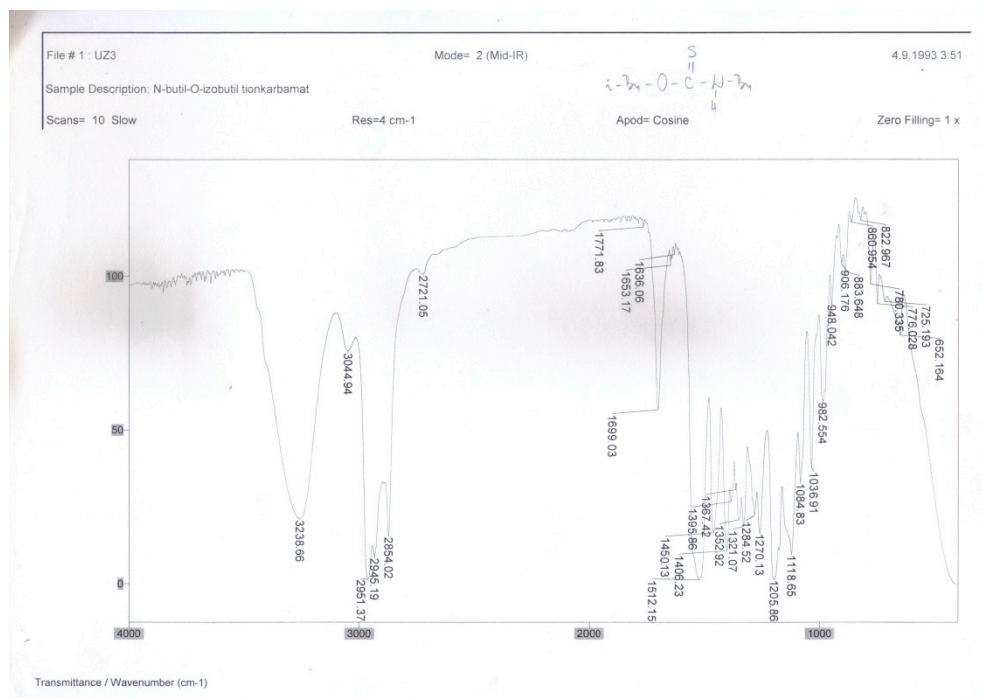

**Figure S4.** FTIR spectrum of N-*sec* butyl-O-isobutyl thiocarbamate.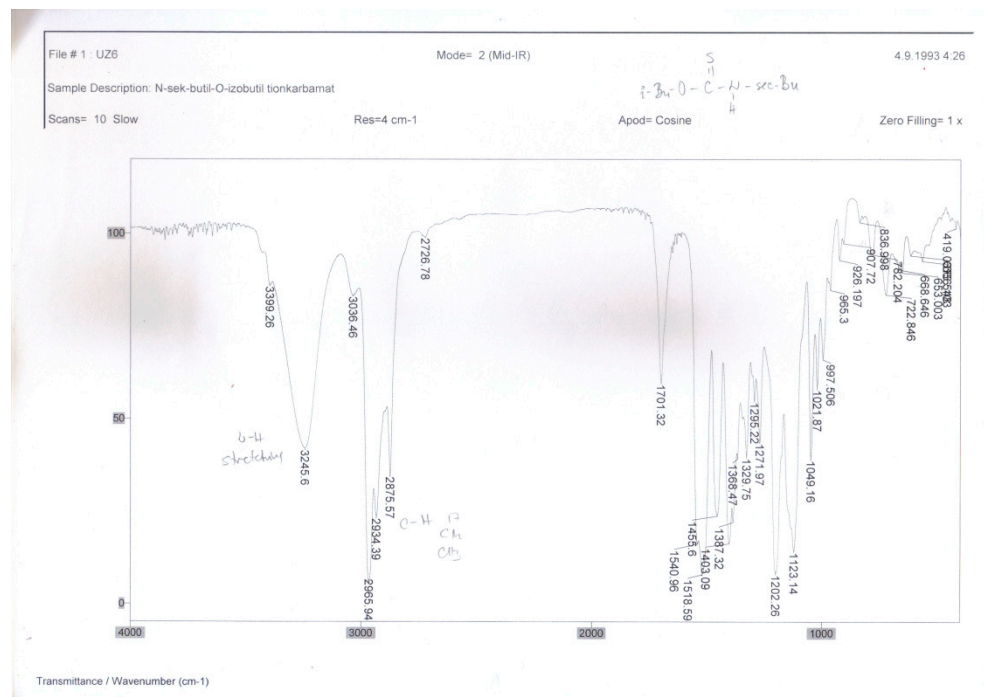**Figure S5.** FTIR spectrum of N-isopropyl-O-isobutyl thiocarbamate.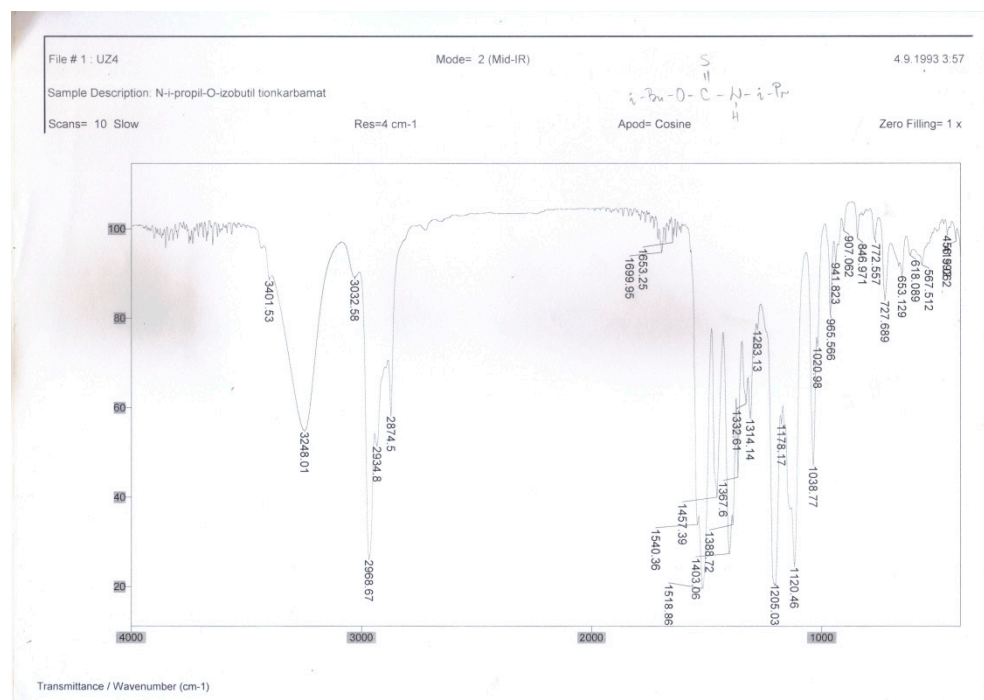

**Figure S6.** FTIR spectrum of N-isobutyl-O-isobutyl thiocarbamate.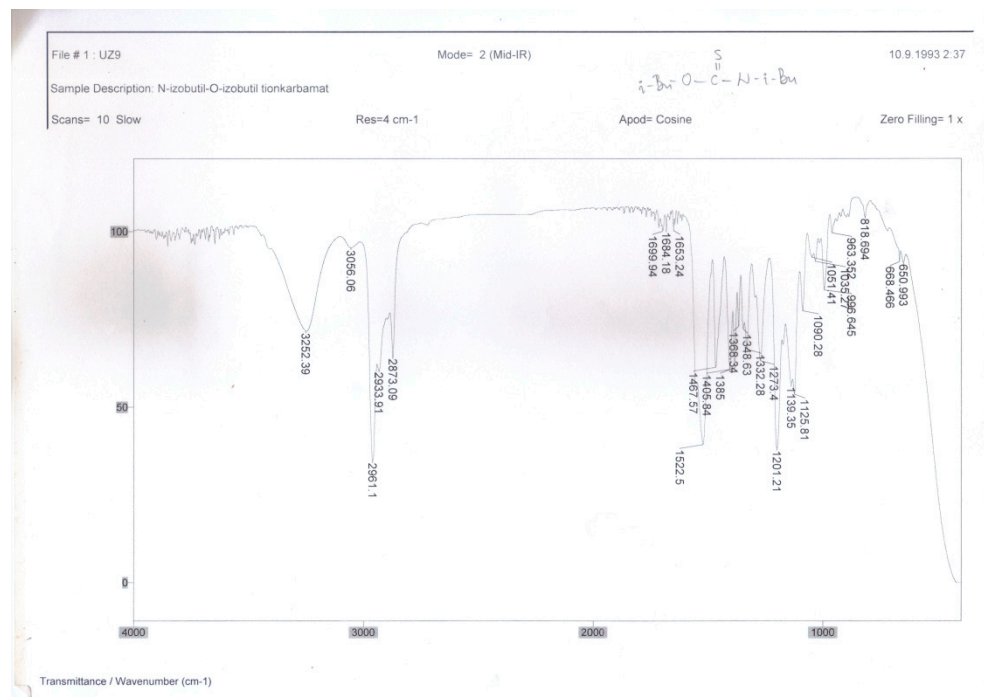**Figure S7.** FTIR spectrum of N-isopentyl-O-isobutyl thiocarbamate.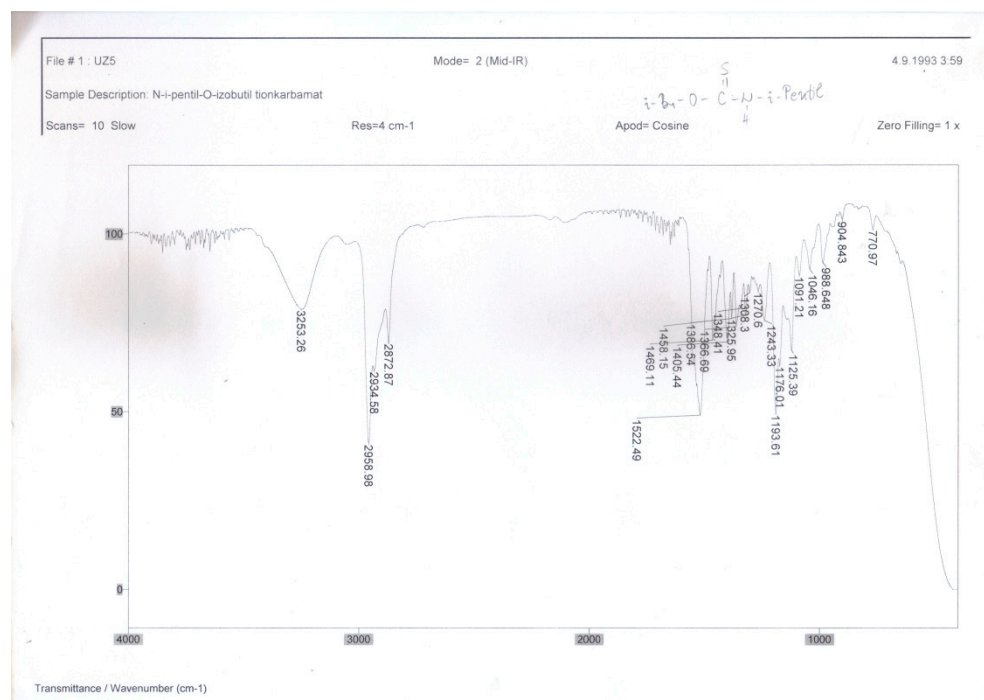

**Figure S8.** FTIR spectrum of N-cyclopentyl-O-isobutyl thiocarbamate.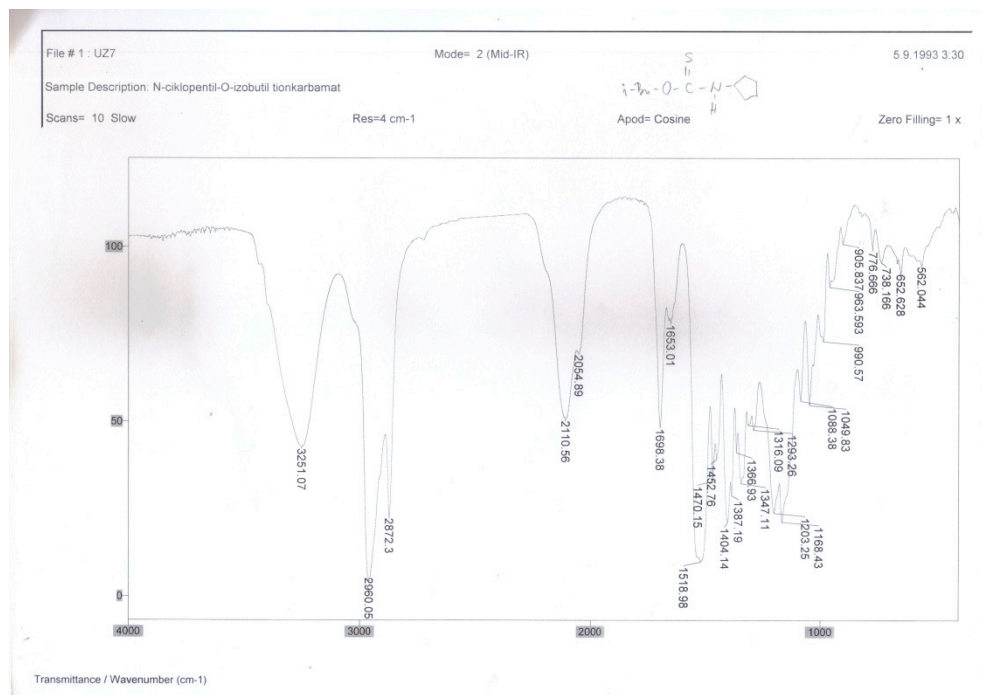**Figure S9.** FTIR spectrum of N-cyclohexyl-O-isobutyl thiocarbamate.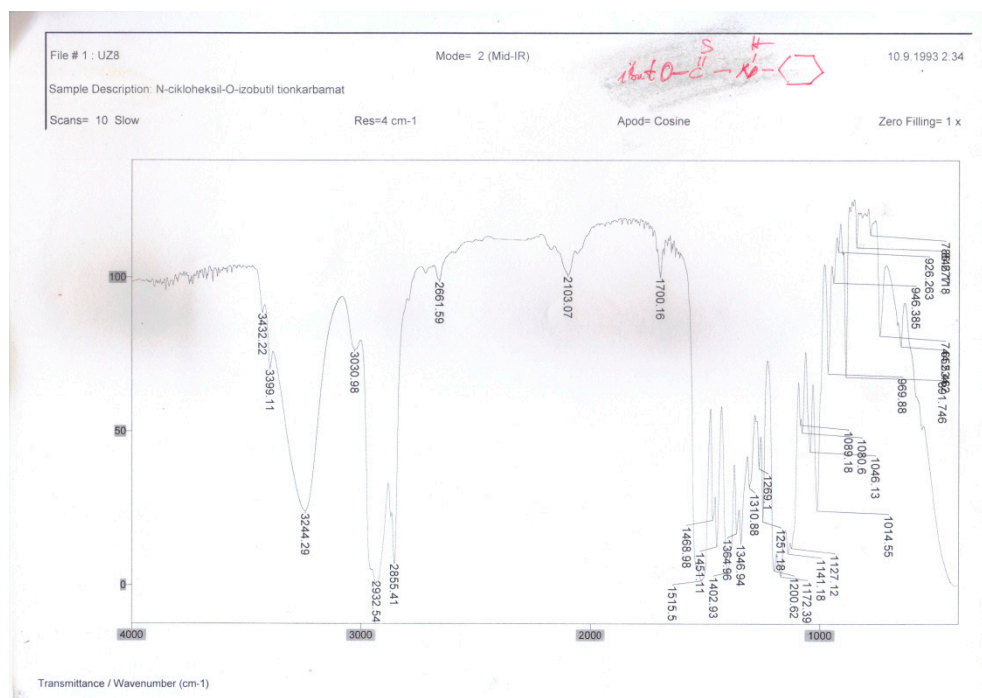



**Figure S10.** FTIR spectrum of N,N-dipropyl-O-isobutyl thiocarbamate.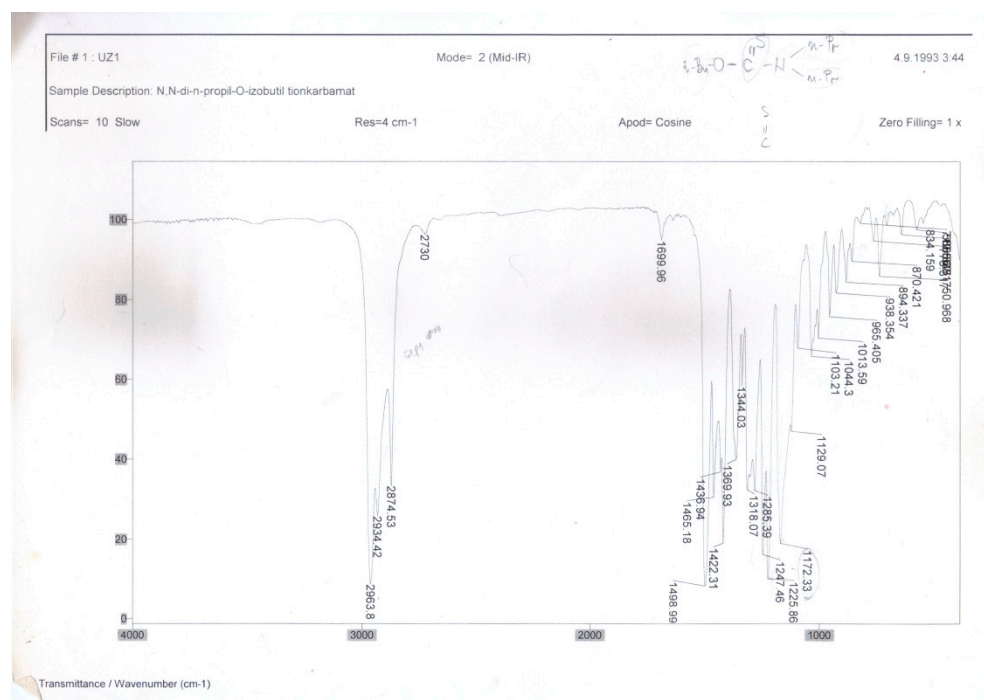**Figure S11.** FTIR spectrum of N-propyl-O-ethoxy thiocarbamate.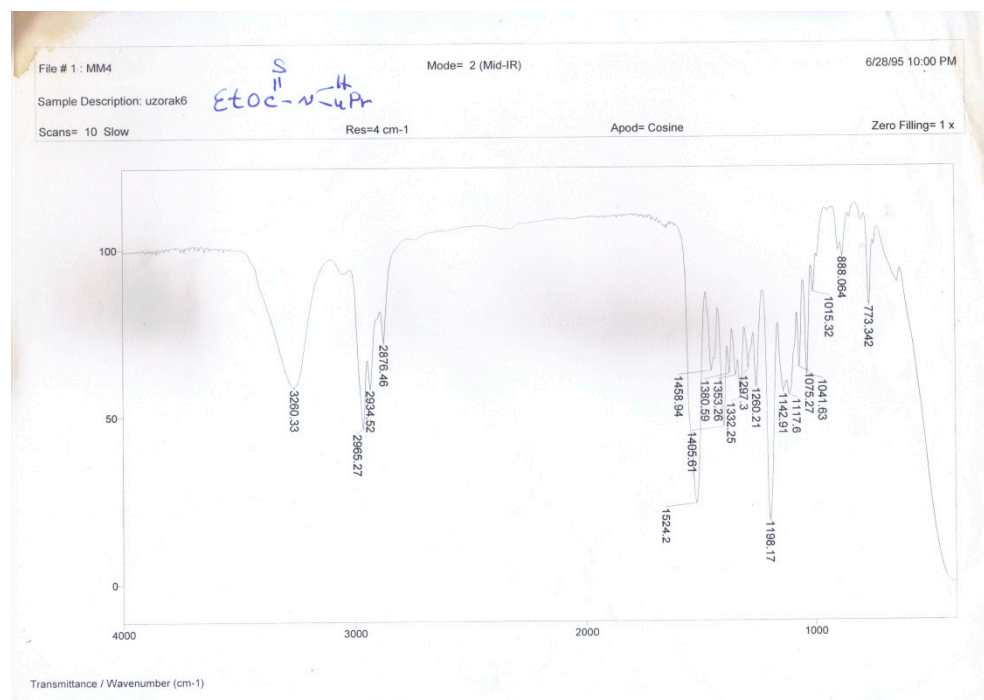

**Figure S12.** FTIR spectrum of N,N-dipropyl-O-ethoxy thiocarbamate.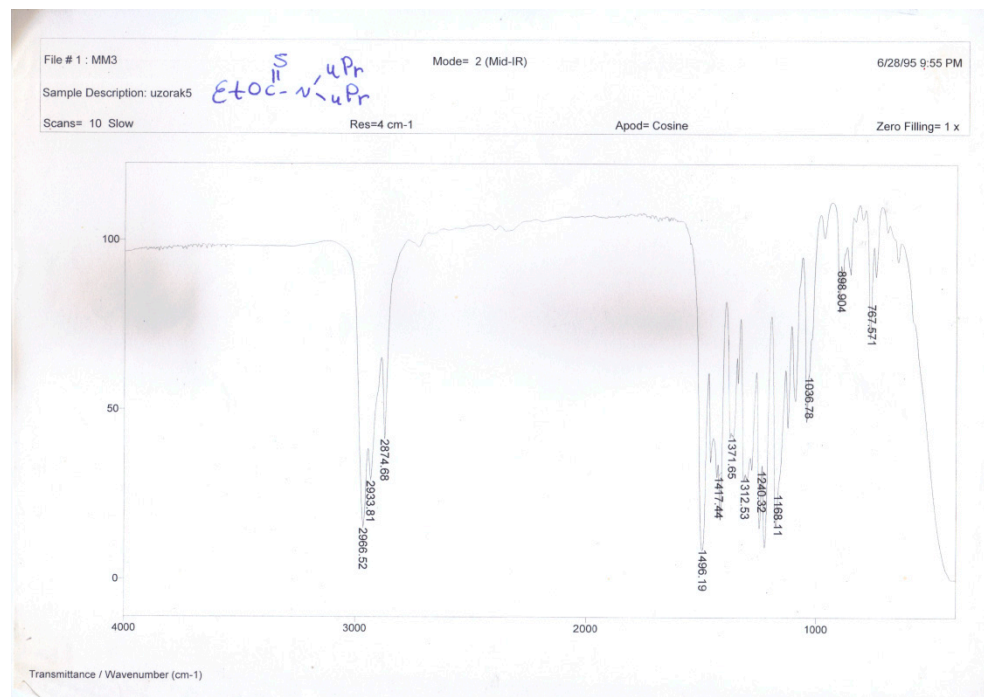**<sup>13</sup>C NMR spectra of synthesized thiocarbamates****Figure S13.** <sup>13</sup>C NMR spectra of N-propyl-O-isobutyl thiocarbamate.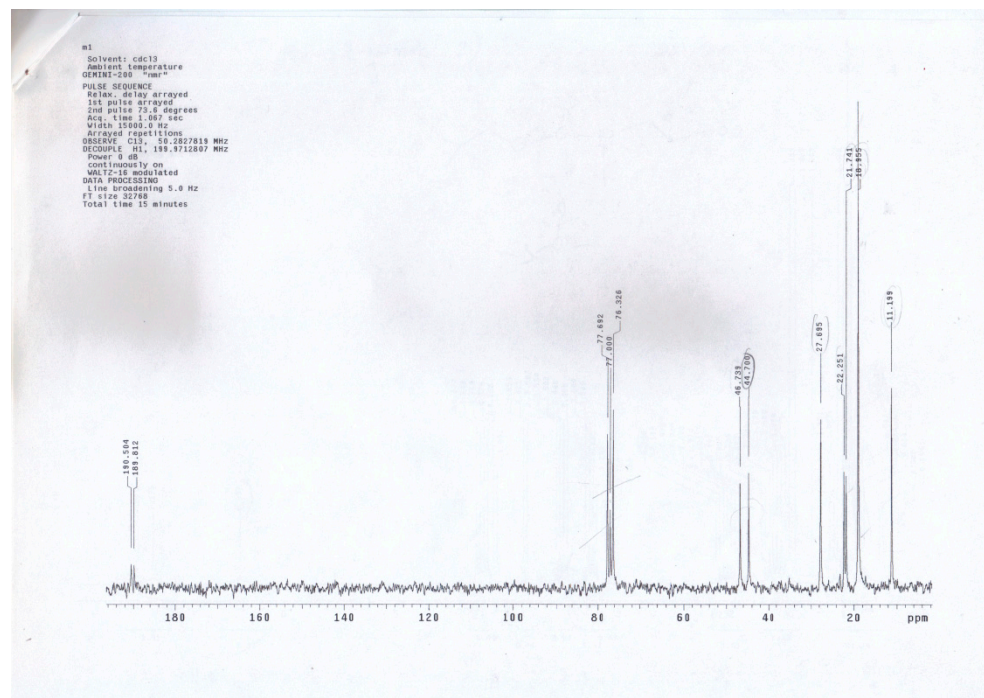

**Figure S14.**  $^{13}\text{C}$  NMR spectra N-sec butyl-O-isobutyl thiocarbamate.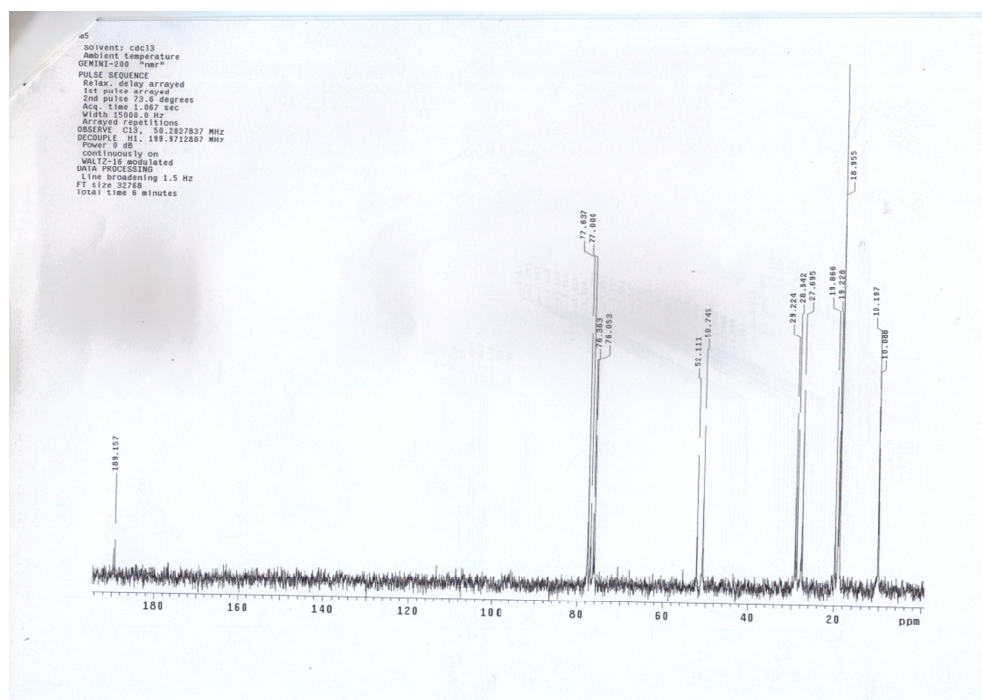**Figure S15.**  $^{13}\text{C}$  NMR spectra of N-isopropyl-O-isobutyl thiocarbamate.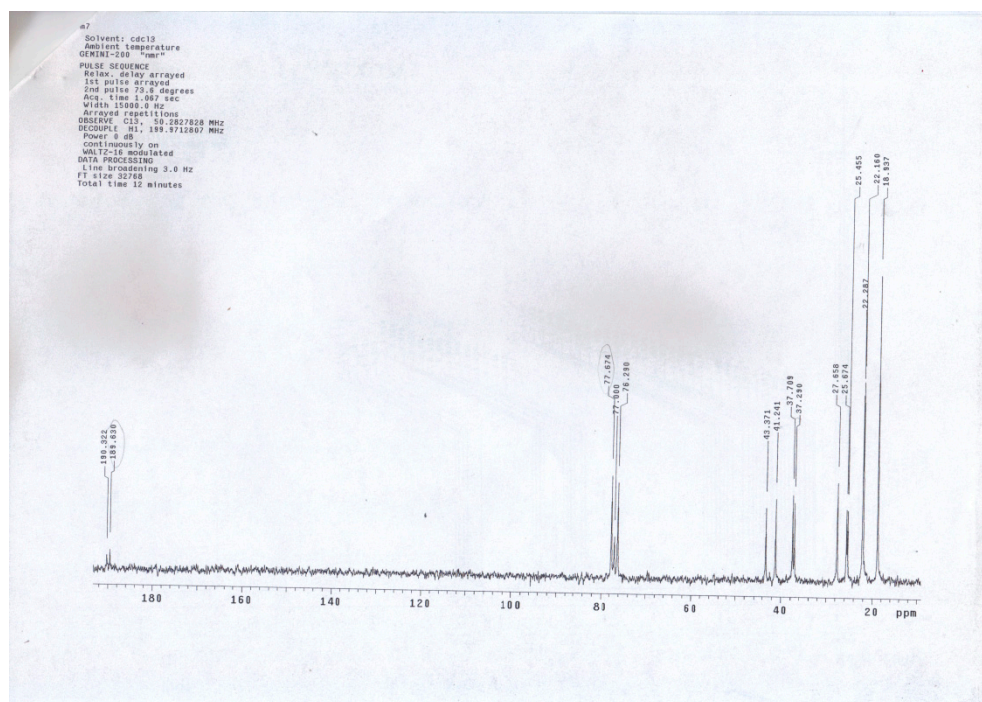



**Figure S16.**  $^{13}\text{C}$  NMR spectra of N-isobutyl-O-isobutyl thiocarbamate.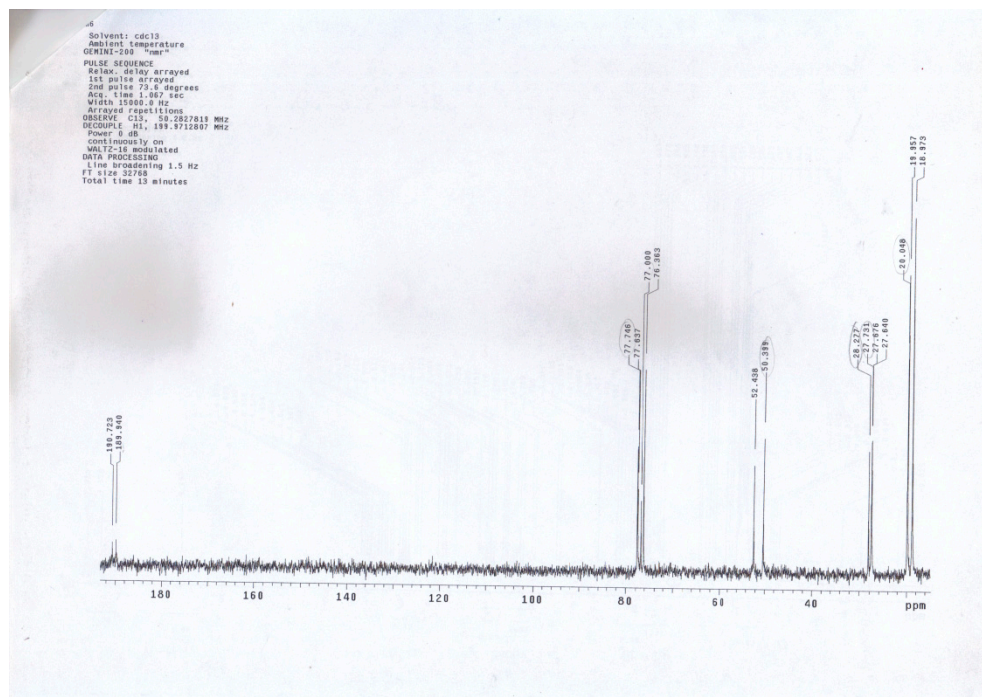**Figure S17.**  $^{13}\text{C}$  NMR spectra of N-isopentyl-O-isobutyl thiocarbamate.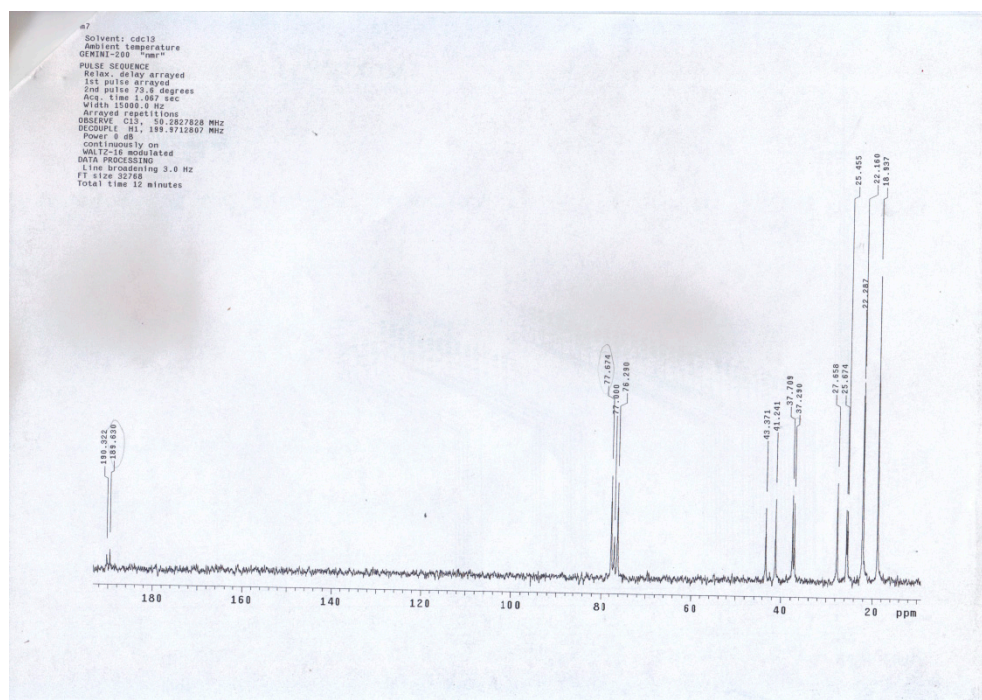

**Figure S18.**  $^{13}\text{C}$  NMR spectra of N-cyclopentyl-O-isobutyl thiocarbamate.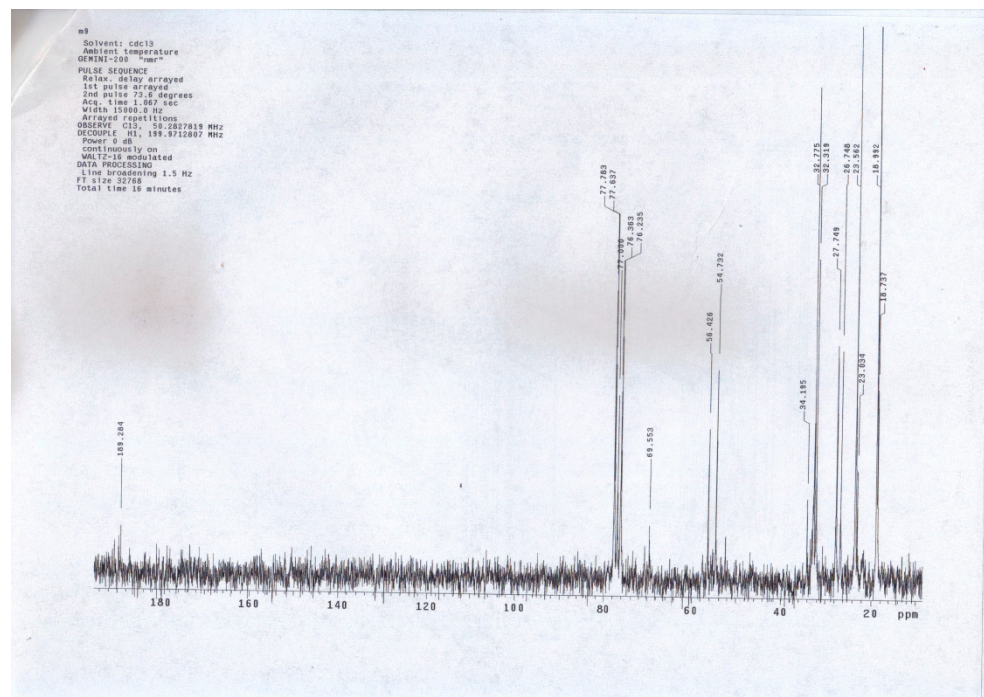**Figure S19.**  $^{13}\text{C}$  NMR spectra N-cyclohexyl-O-isobutyl thiocarbamate.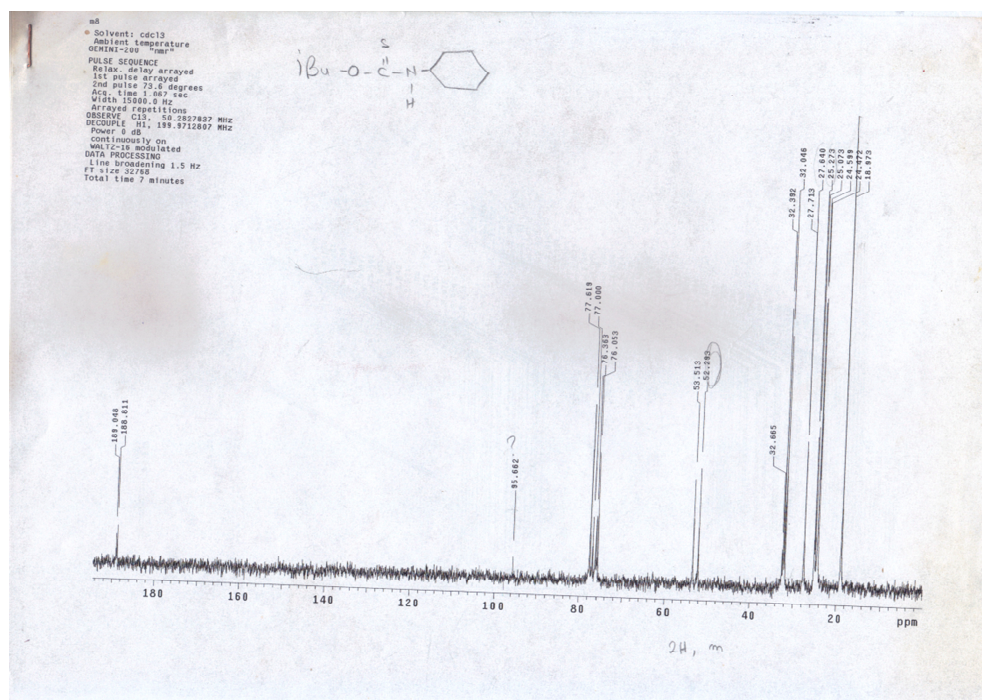



**Figure S20.**  $^{13}\text{C}$  NMR spectra of N,N-dipropyl-O-isobutyl thiocarbamate.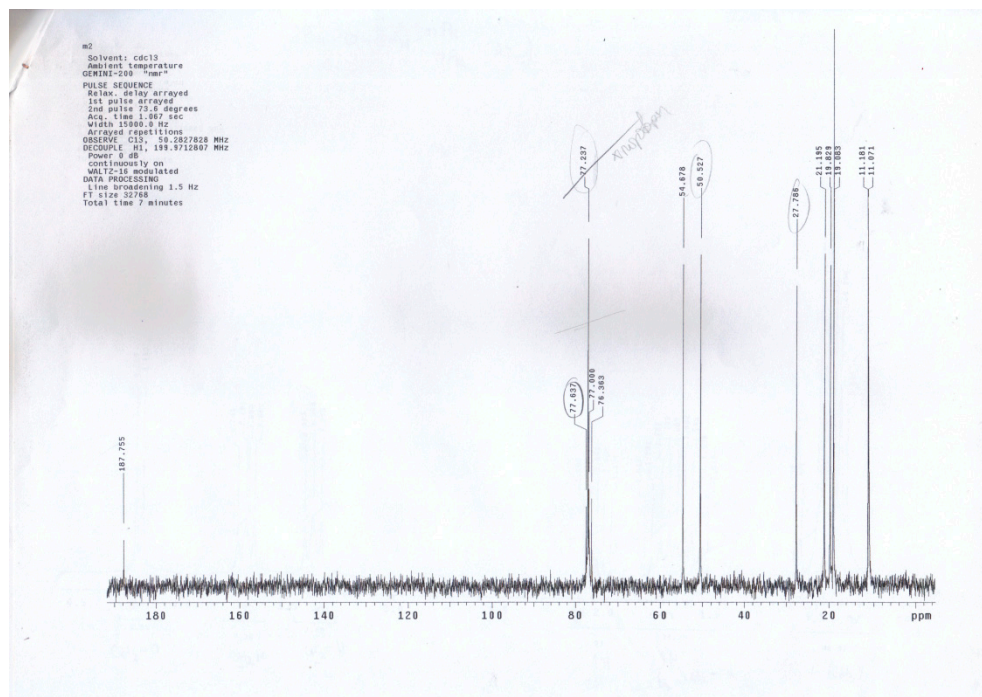**Figure S21.**  $^{13}\text{C}$  NMR spectra of N,N-dibutyl-O-isobutyl thiocarbamate.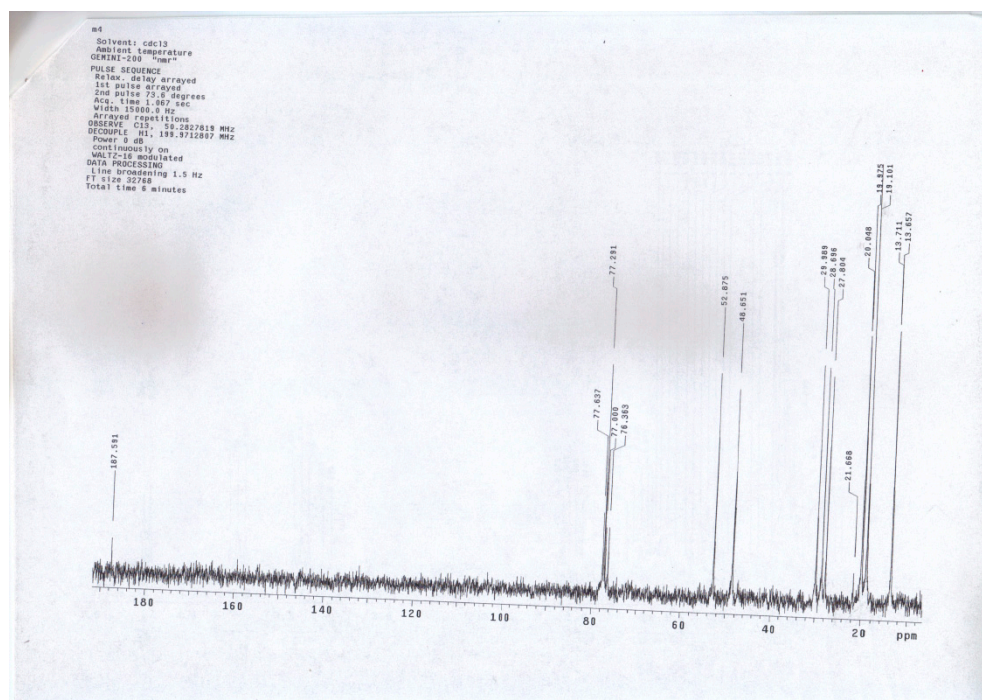

**Figure S22.**  $^{13}\text{C}$  NMR spectra of N,N-dipropyl-O-isobutyl thiocarbamate.**Figure S23.** GC-MS chromatogram for N-isobutyl-O-isobutyl thiocarbamate.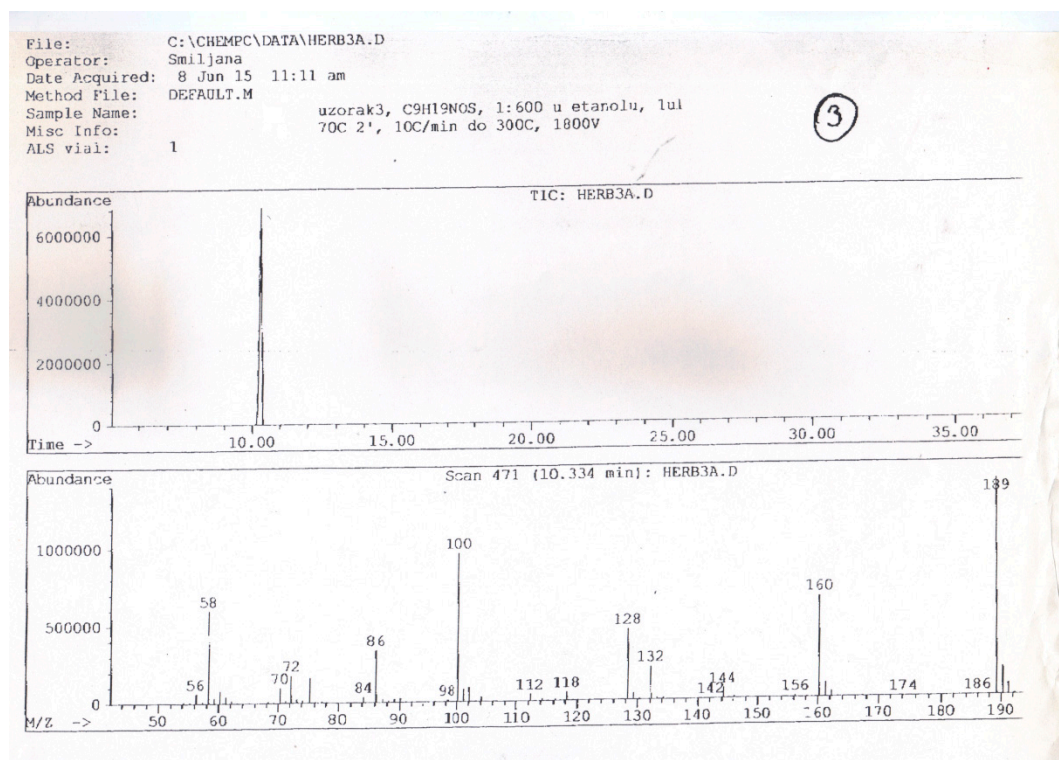



**Figure S24.** GC-MS chromatogram for N-butyl-O-isobutyl thiocarbamate.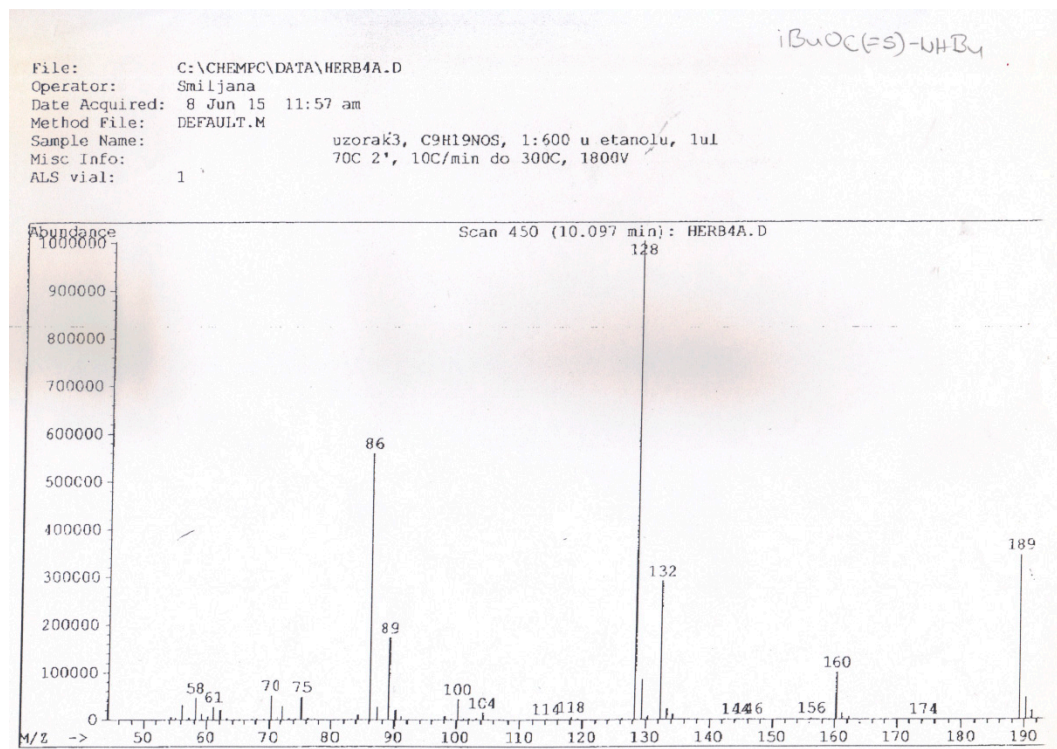**Figure S25.** GC chromatogram for N-ethyl-O-isobutyl thiocarbamate (method B).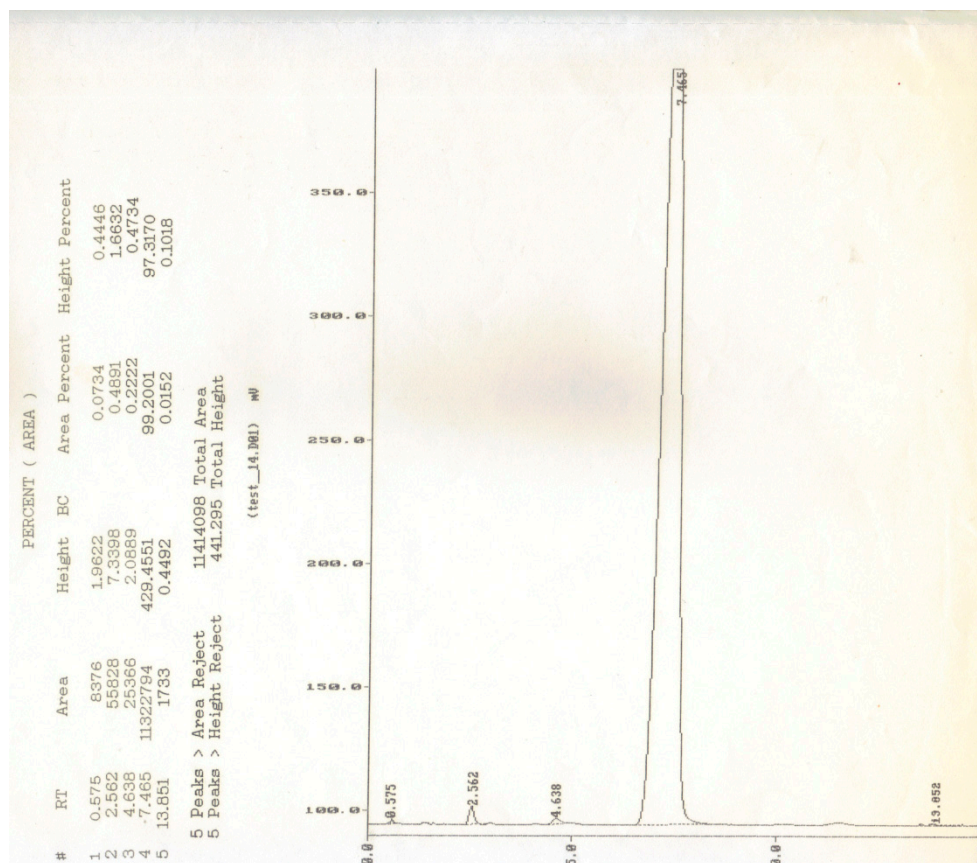

**Figure S26.** GC chromatogram for N-ethyl-O-isobutyl thiocarbamate (method A).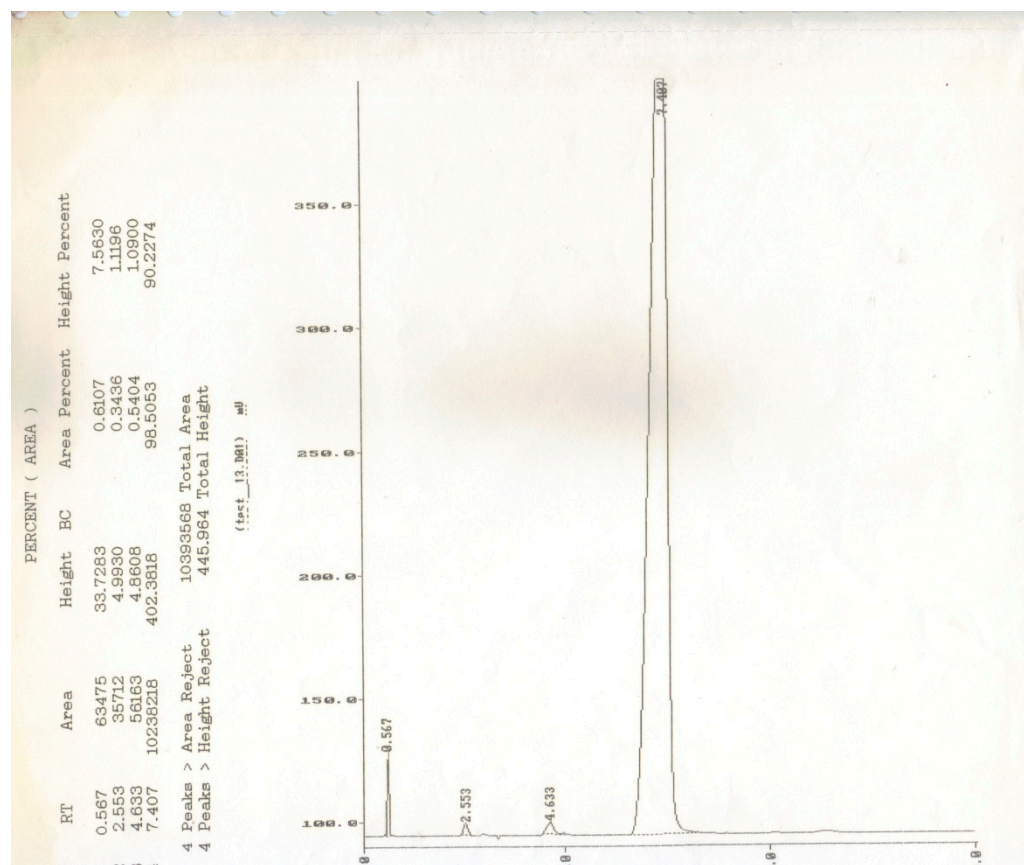**Figure S27.** GC chromatogram for N-ethyl-O-isobutyl thiocarbamate (method C).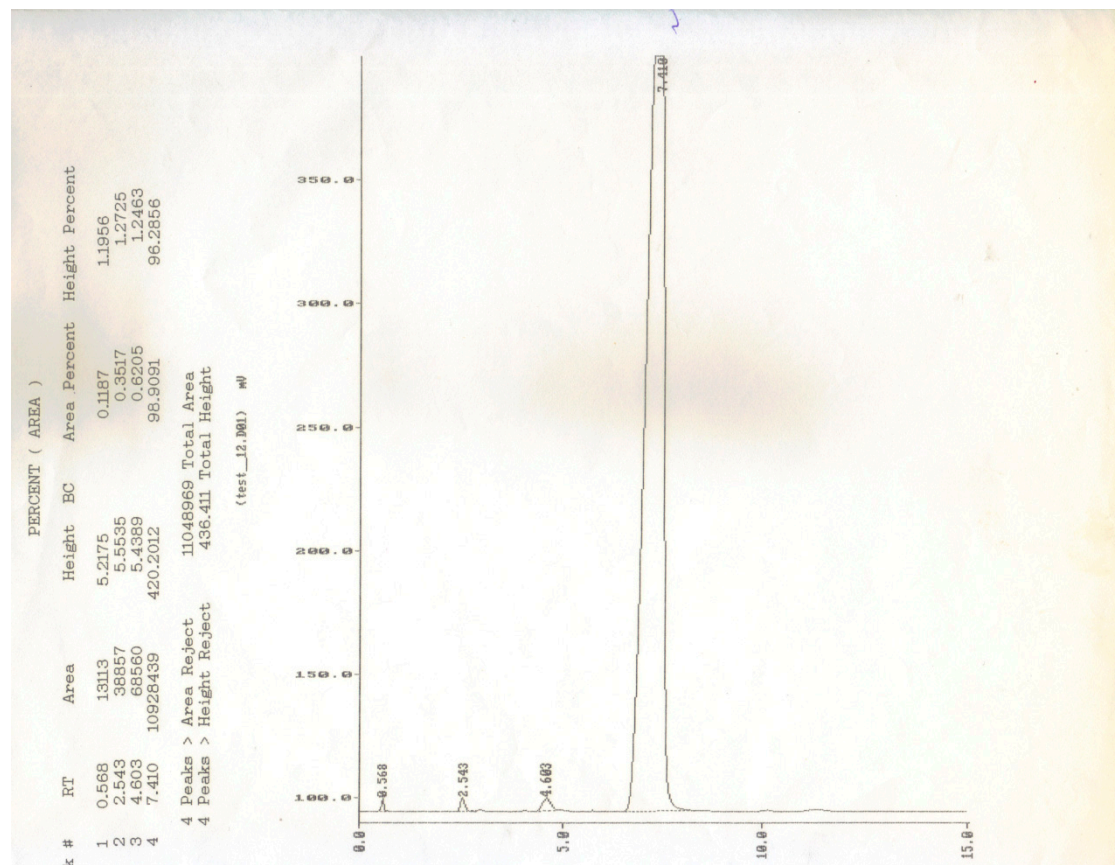

Supplement: s1 [file s1]
